# Supplementary material
Source: PubMed Central journal article supplement (PMC4082799)
Supplement: NIHMS590712-supplement-01.pdf [file NIHMS590712-supplement-01.pdf]

## SUPPLEMENTAL DATA

Figure S1, Related to Table 1. Minimal Edit Distances Near Indels

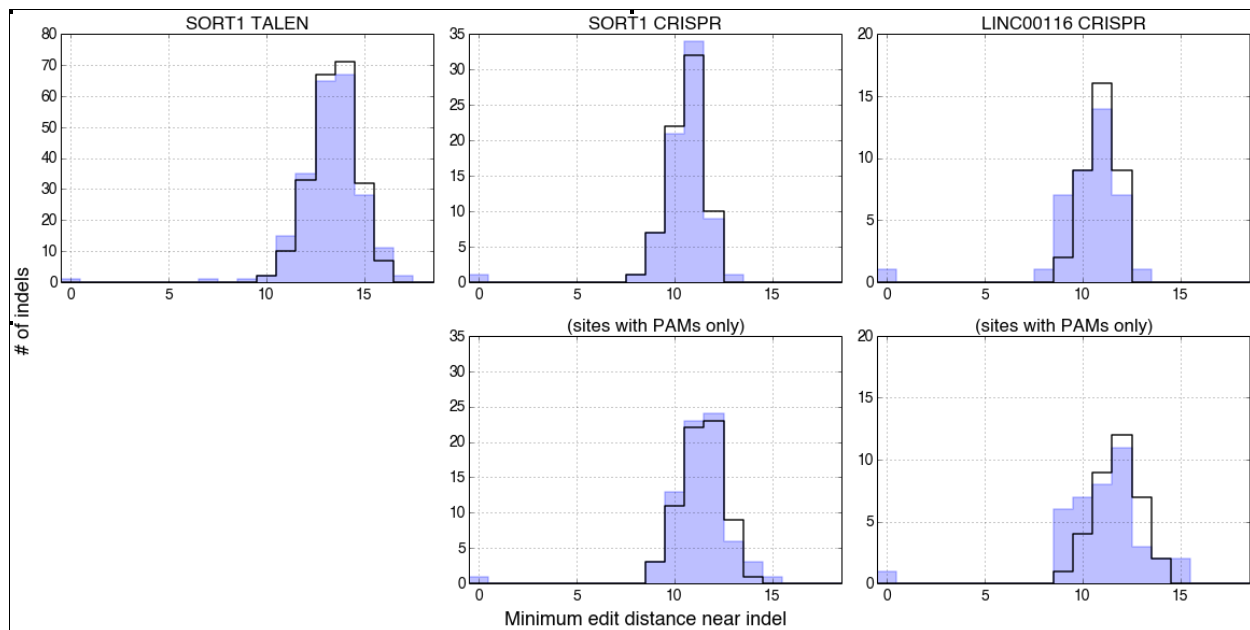

In each panel, the blue shaded area represents the distribution of minimal edit distances for each nuclease's subset of 381 filtered indels, and the black line represents the expected distribution inferred from 50,000 randomly sampled parental HUES 9 line indels. Top row, minimal edit distances across a 100-bp window around a given indel. Bottom row, minimal edit distances across a 100-bp window, retaining only sequences that end in an NGG or NAG PAM sequence.

**Table S1, Related to Table 1. Unique Indels Detected by Whole-genome Sequencing**

| Chr | Pos              | 5' flanking sequence         | Ref                                   | Alternate    | 3' flanking sequence         | SORT1 TALENs |             |              | SORT1 CRISPR-Cas9 |             |             | LINC00116 CRISPR-Cas9 |             |       |              |
|-----|------------------|------------------------------|---------------------------------------|--------------|------------------------------|--------------|-------------|--------------|-------------------|-------------|-------------|-----------------------|-------------|-------|--------------|
|     |                  |                              |                                       |              |                              | A            | B           | C            | D                 | E           | F           | G                     | H           | I     |              |
| 1   | 81390259         | ATAGCCTAAGAAGATATTCC         | <u>CATATGGTG</u>                      | C            | TTCTCAGAGCTCTTAGTGTG         |              |             |              |                   |             |             |                       |             |       | 25,11        |
| 1   | <b>109910034</b> | <b>GTGTTATTGATCTCACCTTC</b>  | <b>G</b>                              | <b>GA</b>    | <b>ATATAGCTTGGACTGTCCAA</b>  |              |             |              |                   | <b>0,13</b> | <b>1,54</b> |                       |             |       |              |
| 1   | <b>109910041</b> | <b>GATCTCACCTTCGATATAGC</b>  | <b>TTGGACT</b>                        | <b>TG</b>    | <b>GTCCAAAAGTCATAATTACC</b>  |              | <b>9,4*</b> |              |                   |             |             |                       |             |       |              |
| 1   | <b>109910043</b> | <b>ATCTCACCTTCGATATAGCT</b>  | <b>TG</b>                             | <b>T</b>     | <b>GACTGTCCAAAAGTCATAAT</b>  |              |             | <b>7,17*</b> |                   |             |             |                       |             |       |              |
| 1   | <b>109910044</b> | <b>TCTCACCTTCGATATAGCTT</b>  | <b>GGACT</b>                          | <b>G</b>     | <b>GTCCAAAAGTCATAATTACC</b>  |              | <b>5,8*</b> |              |                   |             |             |                       |             |       |              |
| 1   | <b>109910046</b> | <b>TCACCTTCGATATAGCTTGG</b>  | <b>ACTGTC</b>                         | <b>A</b>     | <b>CAAAAAGTCATAATTACCAGT</b> |              |             | <b>20,8*</b> |                   |             |             |                       |             |       |              |
| 1   | 170931870        | AATTTGTGCCTAATTTGAGC         | TG                                    | T            | TTTTTTTTAATTCATTTAAA         |              |             |              | 8,17              |             |             |                       |             |       |              |
| 2   | 9705788          | CGAGAGACTGAAAGAAAAGC         | AGCAAAGCCCTGGGT                       | A            | AATCAAGGCCCTAACCGGAA         |              | 8,5         |              |                   |             |             |                       |             |       |              |
| 2   | 76409962         | ACAAGTTGAAGATGACAATC         | TG                                    | T            | TGGCAATTCACAATATTGT          |              |             |              | 14,7              |             |             |                       |             |       |              |
| 2   | <b>110970046</b> | <b>TGCCAGCCAGGAGTACTCC</b>   | <b>AGAAGC</b>                         | <b>A</b>     | <b>GAAGGCTACTAGCACGGACA</b>  |              |             |              |                   |             |             |                       |             |       | <b>4,58</b>  |
| 2   | <b>110970049</b> | <b>CAGCCCAGGAGTACTCCAGA</b>  | <b>A</b>                              | <b>AG</b>    | <b>GCGAAGGCTACTAGCACGGA</b>  |              |             |              |                   |             |             |                       | <b>1,34</b> |       |              |
| 2   | 136347377        | GACTTGGATAATATATCTGT         | CACATTATATAATATATATTATGC<br>AAATCTGTT | C            | ACATTATATAATATATATGA         |              |             | 12,10        |                   |             |             |                       |             |       |              |
| 3   | 138374851        | TATGTACTTCCCAGATTCTT         | TC                                    | T            | CCTCCTGGCTAAGAACCATC         |              |             |              | 16,11             |             |             |                       |             |       |              |
| 3   | 195706577        | CCACACGCTTACAAAGACACA        | C                                     | CAT          | GAGCCGAACGCTTTCGGGGC         |              |             |              |                   |             | 5,3         |                       |             |       |              |
| 4   | 65647862         | TATTAGTAAGCAAAACATGC         | TG                                    | T            | TTTGAGTAGTTATGATTTTG         | 11,12        |             |              |                   |             |             |                       |             |       |              |
| 4   | 67241317         | TGACAATCATAACTTTTTTA         | G                                     | GCCT         | CCTCATGCACACAGAAAAG          |              |             | 11,10        |                   |             |             |                       |             |       |              |
| 4   | 117364346        | TTTAAAATATTATCTATGAG         | GAATATTTTC                            | G            | TATATTTTTACCTTGAATAT         |              |             |              |                   |             | 9,5         |                       |             |       |              |
| 4   | <b>126910474</b> | <b>TTACAGGAAAGATACTTGT</b>   | <b>GACTTTGGTGATACAGA</b>              | <b>G</b>     | <b>ACAAGGATTGAATGTGTTAT</b>  |              | <b>8,4</b>  |              |                   |             |             |                       |             |       |              |
| 5   | <b>850612</b>    | <b>CTGGAAGTAGTGCAAGGGGTA</b> | <b>AC</b>                             | <b>A</b>     | <b>GACCAGCCGTTCACTCTGGA</b>  |              |             |              |                   |             |             |                       |             |       | <b>43,15</b> |
| 5   | 32712655         | CCAGGCCAGTGAGAGAGGTG         | A                                     | AG           | GCAGGGGCGCTCCCGGGCC          |              |             |              |                   |             |             |                       |             | 30,35 |              |
| 6   | 156267271        | TTTAAAGCCATGTTTTTAG          | TA                                    | T            | ACTAAATGTTGCTGCTTTAG         |              |             |              |                   | 13,12       |             |                       |             |       |              |
| 7   | 23212217         | GTGTGAAGAAAGAAAAAGA          | ATTAT                                 | A            | TTATCTTCGAAGCATCTTCC         |              |             |              |                   | 19,16       |             |                       |             |       |              |
| 8   | 127961691        | ATTGATTTGCTATGGGCAAA         | A                                     | AAG          | AAAAAAAAAAAAAAAAAGAGGAA      |              |             |              | 4,5               |             |             |                       |             |       |              |
| 8   | 132181273        | AAATCCCTTCAAATTTTGT          | TCTAC                                 | TGAAGGGATTTA | ATTTTCTAAACCTAATATTG         |              |             |              |                   |             |             |                       |             | 6,11  |              |
| 9   | 33682336         | TGAGTCTTGGAACATTTGT          | GAA                                   | G            | ATTCTTATTCTGAGTTTGCC         | 18,14        |             |              |                   |             |             |                       |             |       |              |
| 10  | 30327724         | ATACAAATGAAGGAAGAAGG         | G                                     | GTA          | TATAGGTCATGTGGAAGGA          |              |             |              |                   |             |             | 34,7                  |             |       |              |
| 10  | 82813787         | TAGAAAAGCAGAAAGACTGA         | GTCTC                                 | G            | TATGAGAGATGTGTTATCGT         |              |             |              |                   |             |             |                       |             | 18,25 |              |
| 10  | 131460181        | TGCTACACCTTTCCATAGG          | CT                                    | C            | TCACTGTCATCTACCCTCAT         |              |             |              |                   |             |             |                       |             | 33,8  |              |
| 11  | 85267884         | CCTCATACAAAGTTTATTCT         | CTCT                                  | C            | TCTAGTTATCCAAATATAGA         |              |             |              |                   |             |             |                       |             | 13,15 |              |
| 12  | 30161597         | TTGTGGAGTCCACCTCATGA         | <u>CCTTGATGGACAGATAGACAT</u>          | C            | CTAACCTGTTCTTGTGAAC          |              |             |              | 34,12             |             |             |                       |             |       |              |
| 13  | 71581221         | AAAAACACTATGAATTCACA         | CATATTTT                              | C            | ATATCTGAAAACATTACCAT         |              |             |              |                   |             |             | 11,3                  |             |       |              |
| 14  | 68143591         | AAAAAATAATCAAAAAGAA          | TTTTA                                 | T            | TTTGTCAATGACAGTTCAAT         |              |             |              |                   | 12,6        |             |                       |             |       |              |
| 17  | 5015438          | GCGGGTGACTTCATCAAGTT         | TG                                    | T            | <u>GCGGGTCTCTTGTGGAATTG</u>  |              |             |              |                   |             |             |                       |             |       | 29,11        |
| 18  | 39827854         | CTTGTGATGACAGCAACCAC         | C                                     | CAAAT        | AAATAACTTGATAGAATTTT         |              |             |              |                   |             |             | 21,6                  |             |       |              |
| 22  | 28415750         | TTCGCCCTGGCTGACTTCTC         | TTTGCC                                | T            | TCACTCTCTGGGCTCTAGA          |              |             |              |                   |             |             |                       |             |       | 50,35        |

Indels at on-target sites are indicated in red bold. A likely nuclease-mediated off-target indel is indicated in blue bold. An indel that lies in the coding sequence of *ZDHC11* is indicated in magenta bold. Underlines indicate potential PAMs (NGG or NAG) within five bases upstream of the indel. Columns A–I indicate reference allele counts (x) and alternate allele counts (y) in the format (x,y) for any of the clones A–I in which the called genotype included at least one copy of the alternate allele. Note: the reference allele counts for the on-target indels in clones B and C marked in red bold and with (\*) do not indicate wild-type alleles—rather, due to the nature of the calling algorithm, they indicate counts of alleles that do not match the alternate alleles; because clones B and C are compound heterozygotes, the reference allele counts actually represent the indels on the other alleles. All on-target and off-target indels in this Table were confirmed with Sanger sequencing.

**Table S2, Related to Table 1. Unique Structural Variants (SVs) Detected by Whole-genome Sequencing**

| SV class                         | Clone    | Treatment group                     | Chr      | Start            | End              | Size          | Split-read consensus                                                                                                                                         |
|----------------------------------|----------|-------------------------------------|----------|------------------|------------------|---------------|--------------------------------------------------------------------------------------------------------------------------------------------------------------|
| <b>Translocation<sup>a</sup></b> | <b>H</b> | <b><i>LINC00116</i> CRISPR-Cas9</b> | <b>4</b> | <b>183998625</b> | <b>183998885</b> | <b>261 bp</b> | <b>chr2   chr4: CTGCCAGCCCAGGAGTACTCCAGAA   <u>G</u>   CTTACATTTGGGGTTGTGATTCTGG<br/>chr4   chr2: CTGGAGGATCCCTTGAGCACAGGAGT   GCGAAGGCTACTAGCACGGACAACT</b> |
| Deletion <sup>b</sup>            | F        | <i>SORT1</i> CRISPR-Cas9            | 6        | 18754456         | 18760023         | 5568 bp       | N/A                                                                                                                                                          |

A structural variant at an on-target site is indicated in red bold. Split-read consensus sequences represent the consensus of all split reads that span the breakpoint. Vertical lines denote precise breakpoint positions.

<sup>a</sup> Translocation represents a duplicated insertion from chromosome 4 that inserted into the on-target chromosome 2 site. The underlined base in the split-read consensus indicates an additional inserted basepair at the breakpoint.

<sup>b</sup> As no split-reads spanned this event, there is not precise refinement of the coordinates.

**Table S3, Related to Table 1. Numbers of Indels and Single Nucleotide Variants (SNVs) Detected by Whole-genome Sequencing**

|                                                         |                     | HUES 9  | A       | B       | C       | D       | E       | F       | G       | H       | I       |
|---------------------------------------------------------|---------------------|---------|---------|---------|---------|---------|---------|---------|---------|---------|---------|
| Raw indel calls                                         | Total               | 881063  | 879305  | 878638  | 886519  | 867987  | 889297  | 873304  | 874320  | 875199  | 873847  |
|                                                         | Missed <sup>a</sup> |         | 39191   | 43335   | 43159   | 35729   | 43211   | 36810   | 36181   | 35699   | 34666   |
|                                                         | De novo             |         | 40949   | 45760   | 37703   | 48805   | 34977   | 44569   | 42924   | 41563   | 41882   |
| Post low-complexity filter                              | Total               | 198172  | 198325  | 198116  | 198923  | 197398  | 199108  | 197898  | 197542  | 197589  | 197436  |
|                                                         | Missed <sup>a</sup> |         | 3518    | 4051    | 3910    | 3198    | 3953    | 3325    | 3006    | 2968    | 2885    |
|                                                         | De novo             |         | 3365    | 4107    | 3159    | 3972    | 3017    | 3599    | 3636    | 3551    | 3621    |
| Post homopolymeric filter                               | Total               | 119573  | 119899  | 119710  | 119980  | 119555  | 120026  | 119735  | 119486  | 119563  | 119513  |
|                                                         | Missed <sup>a</sup> |         | 1220    | 1457    | 1334    | 1007    | 1359    | 1074    | 881     | 878     | 852     |
|                                                         | De novo             |         | 894     | 1320    | 927     | 1025    | 906     | 912     | 968     | 888     | 912     |
| De novo, nuclease-specific indels                       |                     |         | 69      | 195     | 146     | 25      | 57      | 30      | 22      | 20      | 17      |
| Sample-specific indels                                  |                     |         | 8       | 78      | 39      | 9       | 29      | 9       | 13      | 12      | 13      |
| Called reads in only one sample, > 2 reads <sup>b</sup> |                     |         | 3       | 10      | 10      | 4       | 6       | 2       | 3       | 6       | 7       |
| Confirmed by Sanger sequencing                          |                     |         | 2       | 4       | 4       | 4       | 4       | 2       | 3       | 6       | 5       |
|                                                         |                     | HUES 9  | A       | B       | C       | D       | E       | F       | G       | H       | I       |
| Raw SNV calls                                           | Total               | 3698888 | 3707753 | 3705830 | 3714888 | 3695767 | 3713222 | 3704487 | 3695231 | 3697396 | 3697034 |
|                                                         | Missed <sup>a</sup> |         | 35795   | 47106   | 45002   | 28291   | 40247   | 33049   | 25713   | 26172   | 26165   |
|                                                         | De novo             |         | 26930   | 40164   | 29002   | 31412   | 25913   | 27450   | 29370   | 27664   | 28019   |
| Post low-complexity filter                              | Total               | 1531069 | 1533920 | 1531422 | 1534449 | 1531074 | 1534452 | 1533074 | 1530709 | 1531112 | 1530978 |
|                                                         | Missed <sup>a</sup> |         | 7984    | 9645    | 9401    | 6064    | 8694    | 7238    | 5313    | 5349    | 5280    |
|                                                         | De novo             |         | 5133    | 9292    | 6021    | 6059    | 5311    | 5233    | 5673    | 5306    | 5371    |
| De novo, nuclease-specific SNVs                         |                     |         | 670     | 1593    | 1513    | 195     | 472     | 344     | 235     | 269     | 206     |
| Sample-specific SNVs                                    |                     |         | 165     | 595     | 538     | 110     | 269     | 163     | 159     | 192     | 147     |
| Called reads in only one sample, > 2 reads              |                     |         | 64      | 115     | 142     | 55      | 94      | 74      | 111     | 127     | 112     |

<sup>a</sup> Calls in the parental HUES 9 line that were not called in the individual clone.

<sup>b</sup> Not included in this tally is an on-target indel shared by clones E and F.
